# Supplementary material for: Quantitation of Lupinus spp. Quinolizidine Alkaloids by qNMR and Accelerated Debittering with a Resin-Based Protocol
Source: MDPI journal article supplement (doi:10.3390/molecules29030582), 2024-01-24
Supplement: s1 [file s1]

Article

# Quantitation of *Lupinus* spp. Quinolizidine Alkaloids by qNMR and Accelerated Debitting with a Resin-Based Protocol

Nikoleta Anna Madelou, Eleni Melliou, Prokopios Magiatis\*

Department of Pharmacy, Laboratory of Pharmacognosy and Natural Products Chemistry, National and Kapodistrian University of Athens, 15771 Athens, Greece; nikoletamadelou@gmail.com (N.M.); emel-liou@pharm.uoa.gr (E.M.); magiatis@pharm.uoa.gr (P.M.)

**Table S1.** Characteristic peaks from <sup>1</sup>H-NMR spectrum of studied alkaloids and their  $\delta$ -values in ppm, used for quantitation.

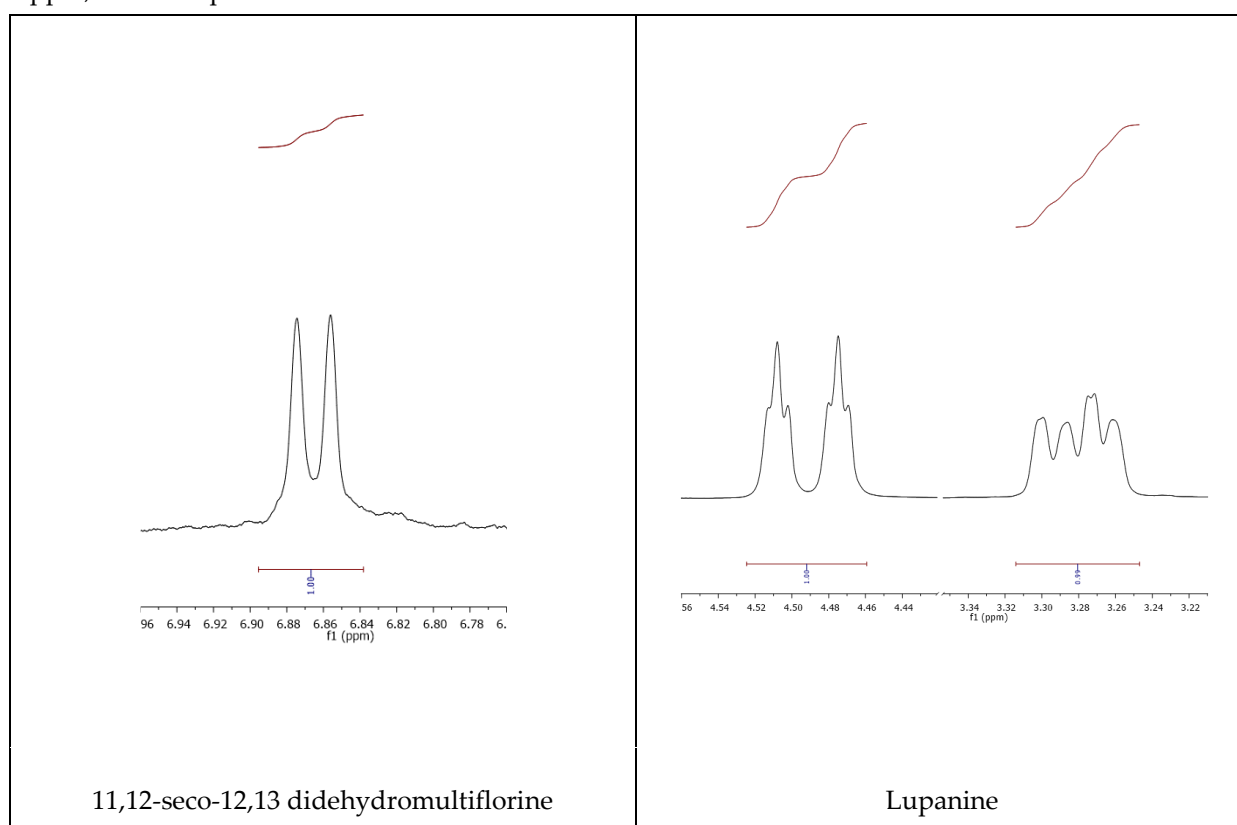

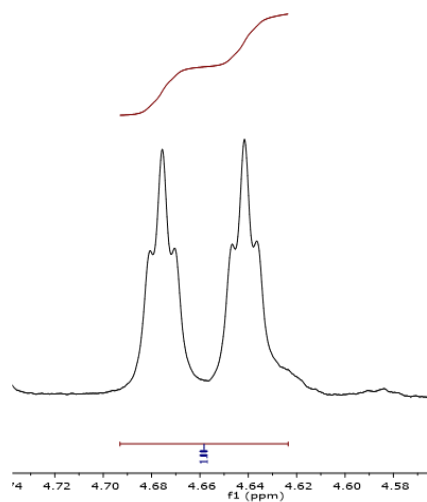

Angustifoline

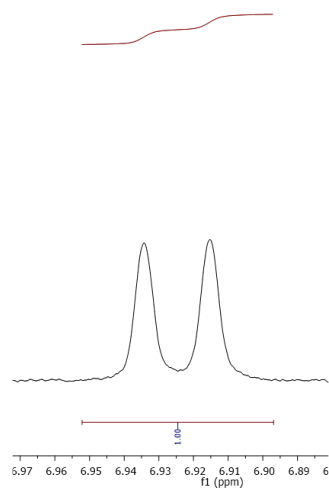

Albine

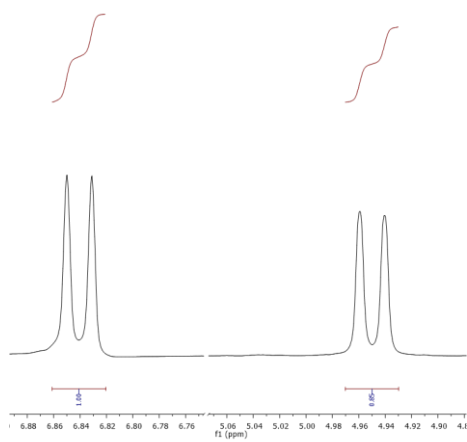

Multiflorine

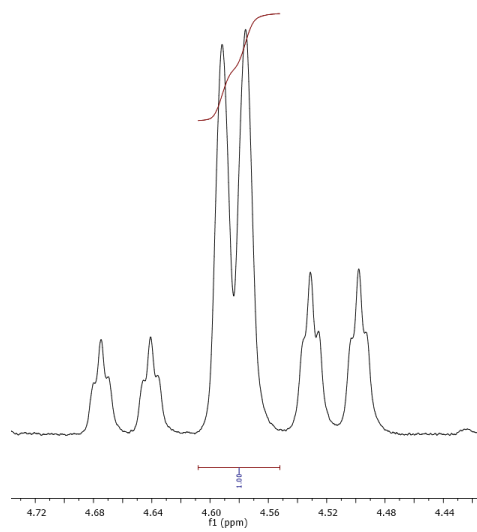

13-OH-lupanine

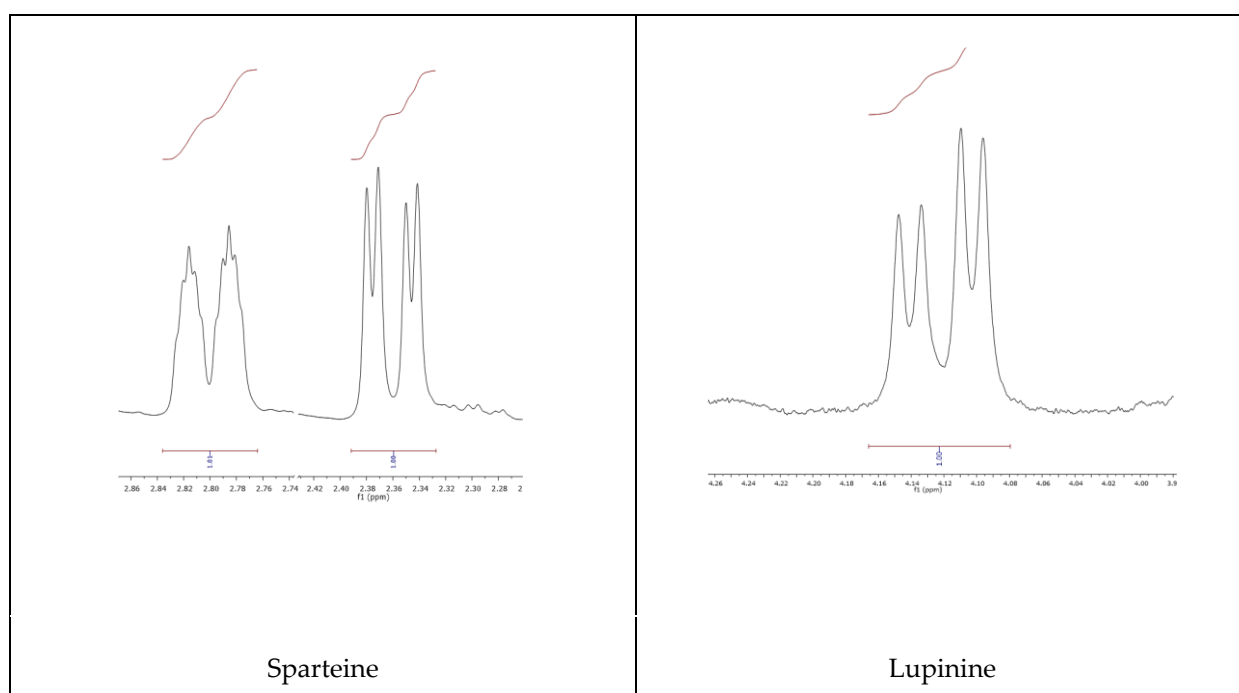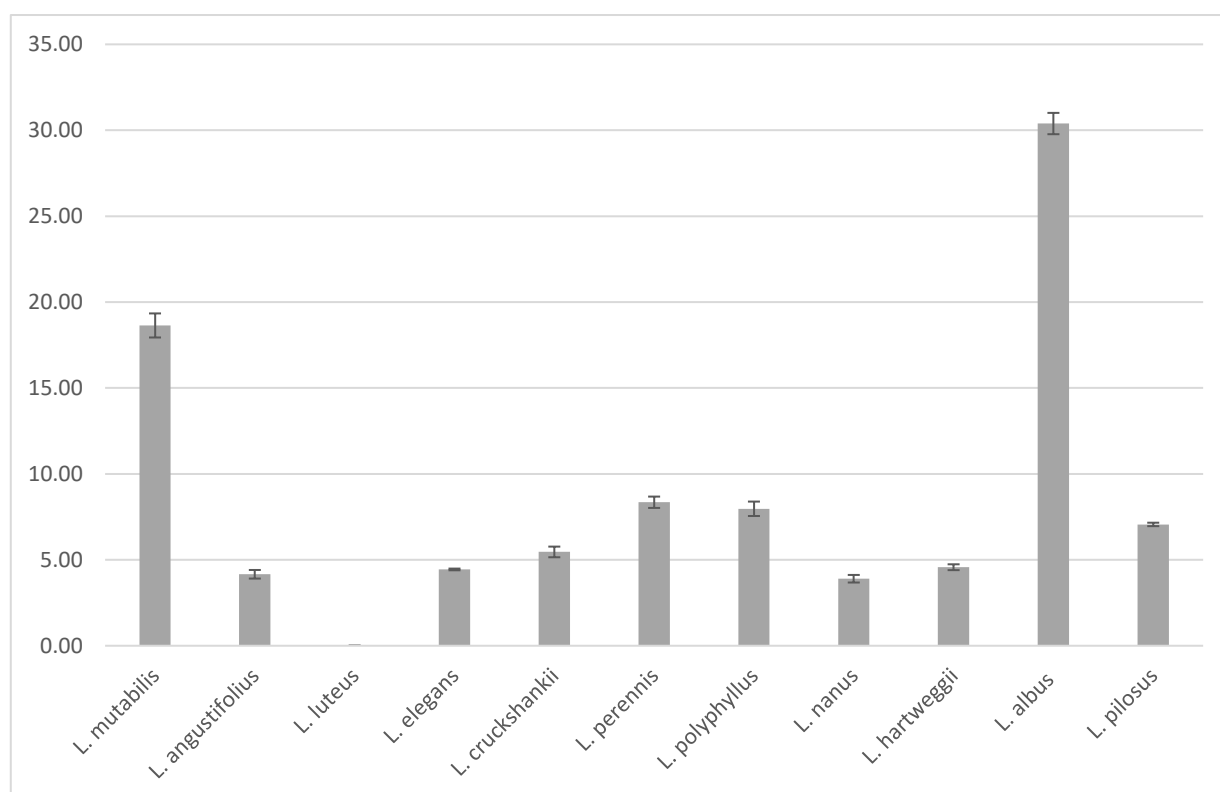

**Figure S1.** Quantitation results of QAs concentration in extracts of each of the studied species, expressed in mg/g DW.

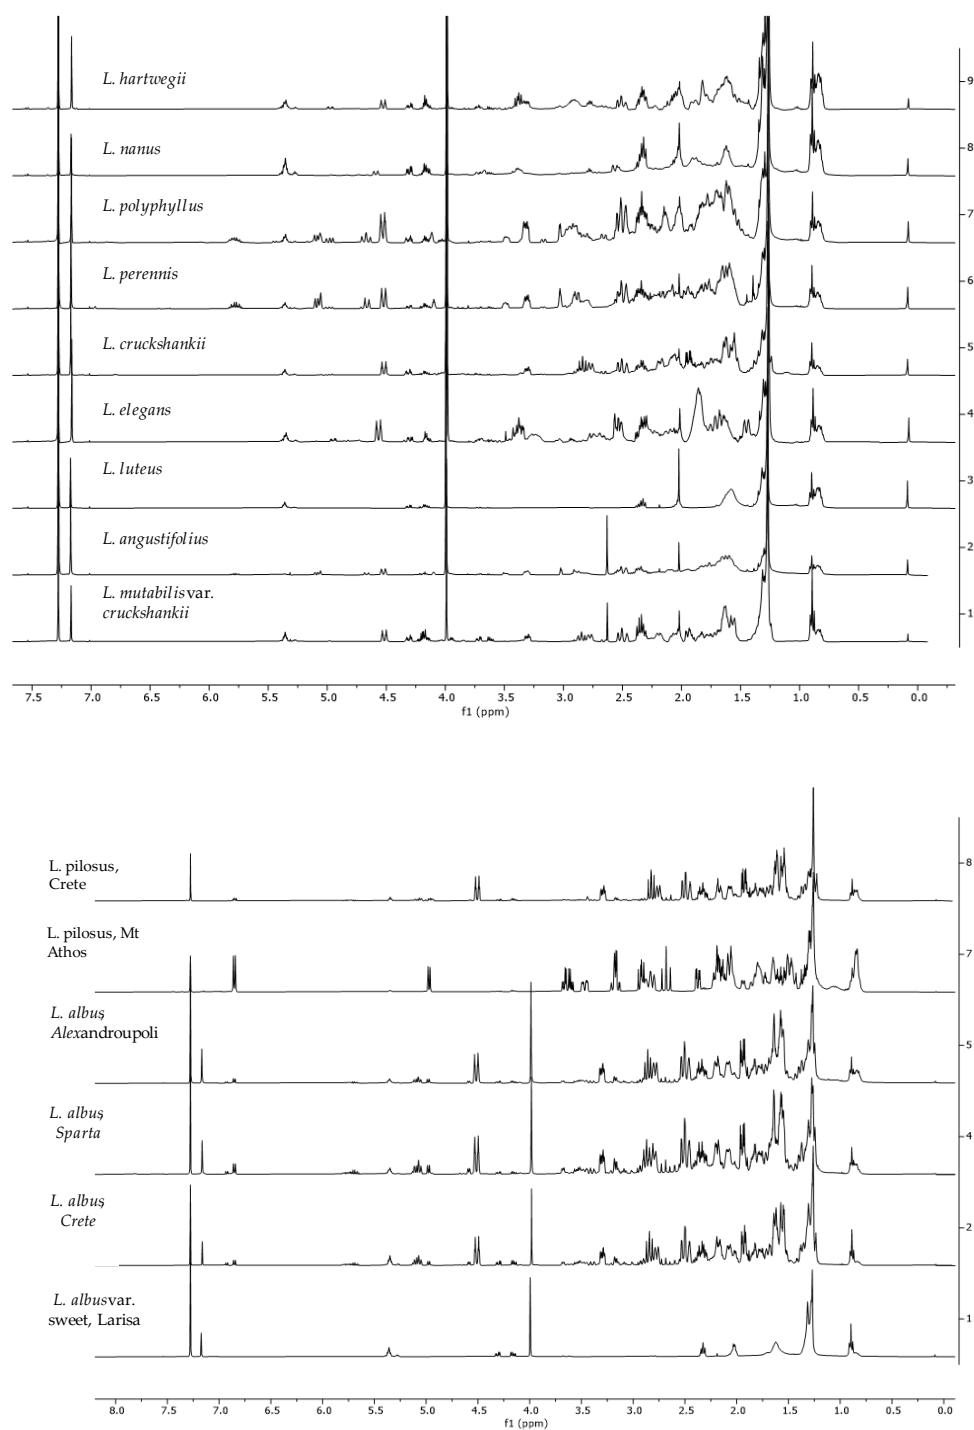

**Figure S2.** <sup>1</sup>H-NMR spectra (400 MHz, CDCl<sub>3</sub>, δ-values in ppm) from all *Lupinus* spp. quantified.

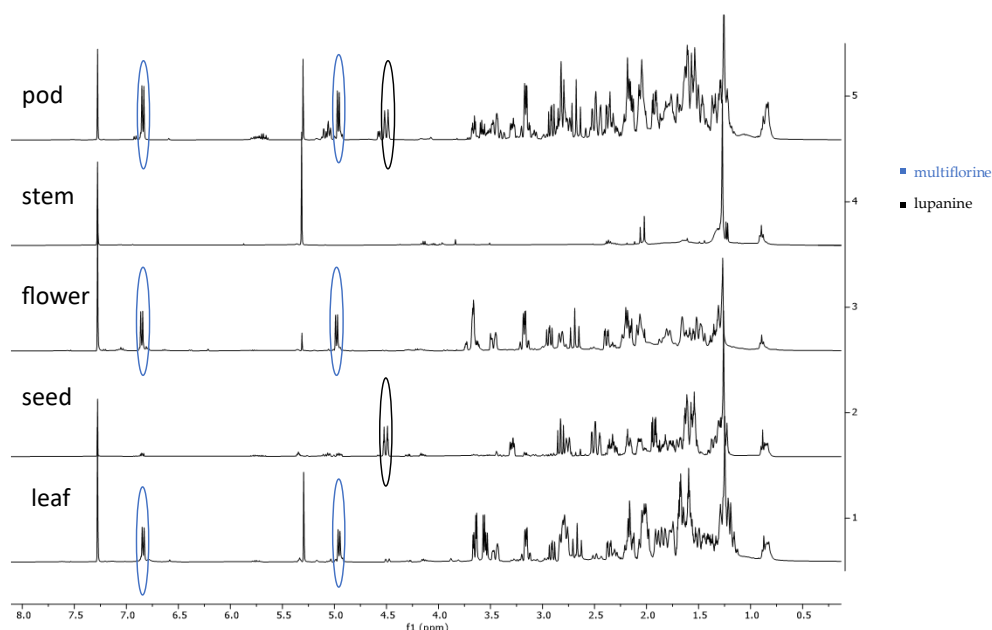

**Figure S3.**  $^1\text{H}$ -NMR spectra (400 MHz,  $\text{CDCl}_3$ ,  $\delta$ -values in ppm) from all aerial parts of *L. pilosus* from Crete in an early stage of development.

**Table S2.** Intraday precision data for the studied substances, expressed as relative standard deviations (%).

| Species                                      | N | Lupanine | 13-OH-lupanine | Multiflorine | Lupanine |
|----------------------------------------------|---|----------|----------------|--------------|----------|
| <i>L. albus</i> , Crete                      | 3 | 1.16     | 2.19           | 6.99         | -        |
| <i>L. albus</i> , Alexandroupoli             | 3 | 1.80     | 5.81           | 5.17         | -        |
| <i>L. albus</i> , Sparta                     | 3 | 1.59     | 2.54           | 2.00         | -        |
| <i>L. albus</i> var. sweet                   | 3 | -        | -              | 6.25         | -        |
| <i>L. pilosus</i> Crete                      | 3 | 2.06     | 6.25           | 2.57         | -        |
| <i>L. pilosus</i> , Mt. Athos                | 3 | -        | -              | 1.33         | 4.34     |
| <i>L. angustifolius</i>                      | 3 | 7.27     | -              | -            | -        |
| <i>L. cruckshankii</i>                       | 3 | 4.43     | -              | -            | -        |
| <i>L. elegans</i>                            | 3 | 1.12     | -              | -            | -        |
| <i>L. hartwegii</i>                          | 3 | 3.71     | -              | -            | -        |
| <i>L. mutabilis</i> var. <i>cruckshankii</i> | 3 | 6.41     | 4.34           | -            | -        |
| <i>L. nanus</i>                              | 3 | 5.64     | -              | -            | -        |
| <i>L. perennis</i>                           | 3 | 5.17     | 7.54           | -            | -        |
| <i>L. polyphyllus</i>                        | 3 | 5.42     | 5.40           | -            | -        |
| <i>L. luteus</i>                             | 3 | -        | -              | -            | -        |

  

| Species                          | N | 11,12-seco-12,13-didehydromultiflorine | Angustifoline | Albine | Sparteine |
|----------------------------------|---|----------------------------------------|---------------|--------|-----------|
| <i>L. albus</i> , Crete          | 3 | 3.20                                   | 6.18          | 3.75   | -         |
| <i>L. albus</i> , Alexandroupoli | 3 | 3.57                                   | 6.66          | 5.40   | -         |
| <i>L. albus</i> , Sparta         | 3 | 3.63                                   | 4.05          | 6.87   | -         |
| <i>L. albus</i> var. sweet       | 3 | -                                      | -             | -      | -         |

---

|                                              |   |      |      |      |      |
|----------------------------------------------|---|------|------|------|------|
| <i>L. pilosus</i> Crete                      | 3 | 6.25 | 7.69 | 6.66 | -    |
| <i>L. pilosus</i> , Mt. Athos                | 3 | -    | -    | -    | -    |
| <i>L. angustifolius</i>                      | 3 | -    | 2.00 | -    | -    |
| <i>L. cruckshankii</i>                       | 3 | -    | -    | -    | 7.40 |
| <i>L. elegans</i>                            | 3 | -    | -    | -    | -    |
| <i>L. hartwegii</i>                          | 3 | -    | -    | -    | -    |
| <i>L. mutabilis</i> var. <i>cruckshankii</i> | 3 | -    | -    | -    | 3.17 |
| <i>L. nanus</i>                              | 3 | -    | -    | -    | -    |
| <i>L. perennis</i>                           | 3 | -    | 1.80 | -    | -    |
| <i>L. polyphyllus</i>                        | 3 | -    | 3.84 | -    | -    |
| <i>L. luteus</i>                             | 3 | -    | -    | -    | -    |

---
